# Supplementary material
Source: PubMed Central journal article supplement (PMC9269868)
Supplement: NIHMS1643638-supplement-Supplementary_Material.pdf [file NIHMS1643638-supplement-Supplementary_Material.pdf]

# Supplementary Materials

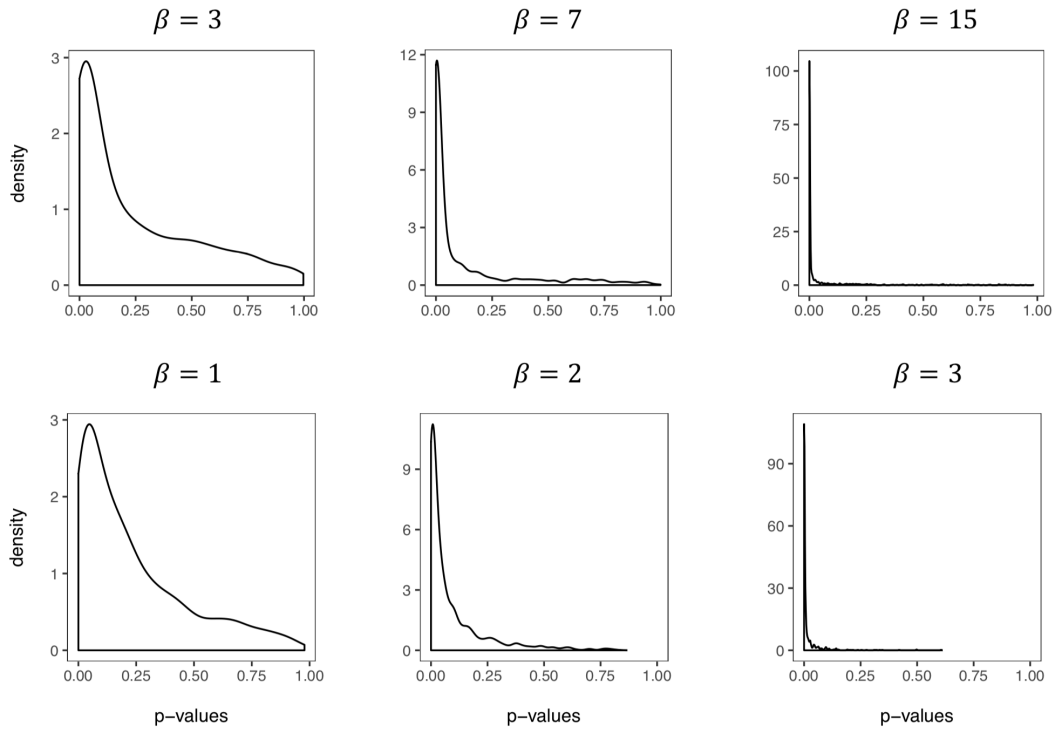

Figure S1: Density functions of  $p$ -values generated from the Beta( $1/\beta, 1$ ) distribution (upper panel) and the Gaussian-tailed model (lower panel). The two plots in each column have comparable “height” at around zero but the upper ones always have heavier right tails.

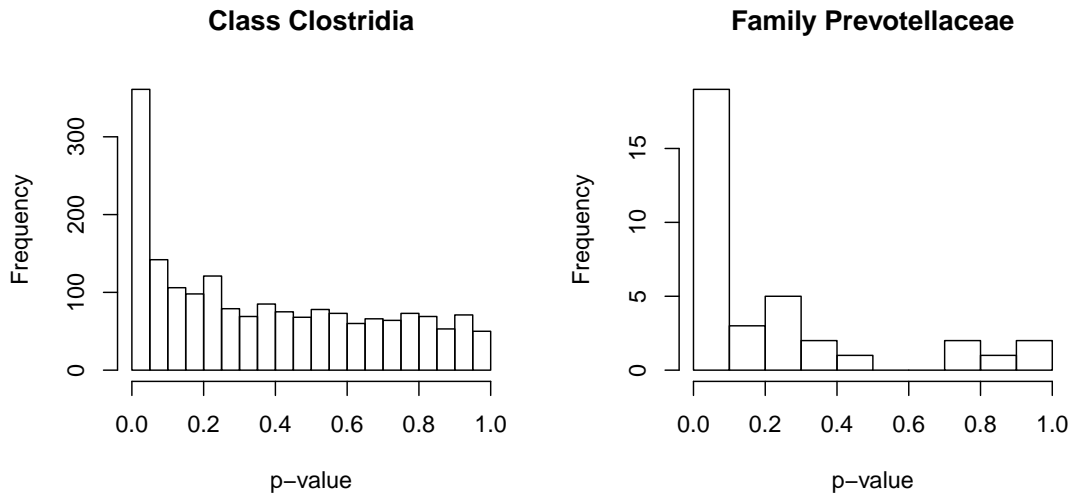

Figure S2: Empirical distributions of  $p$ -values for OTUs in class *Clostridia* and family *Prevotellaceae* in the IBD data. These two taxa were detected to be driver taxa by the bottom-up test and contain the most OTUs.

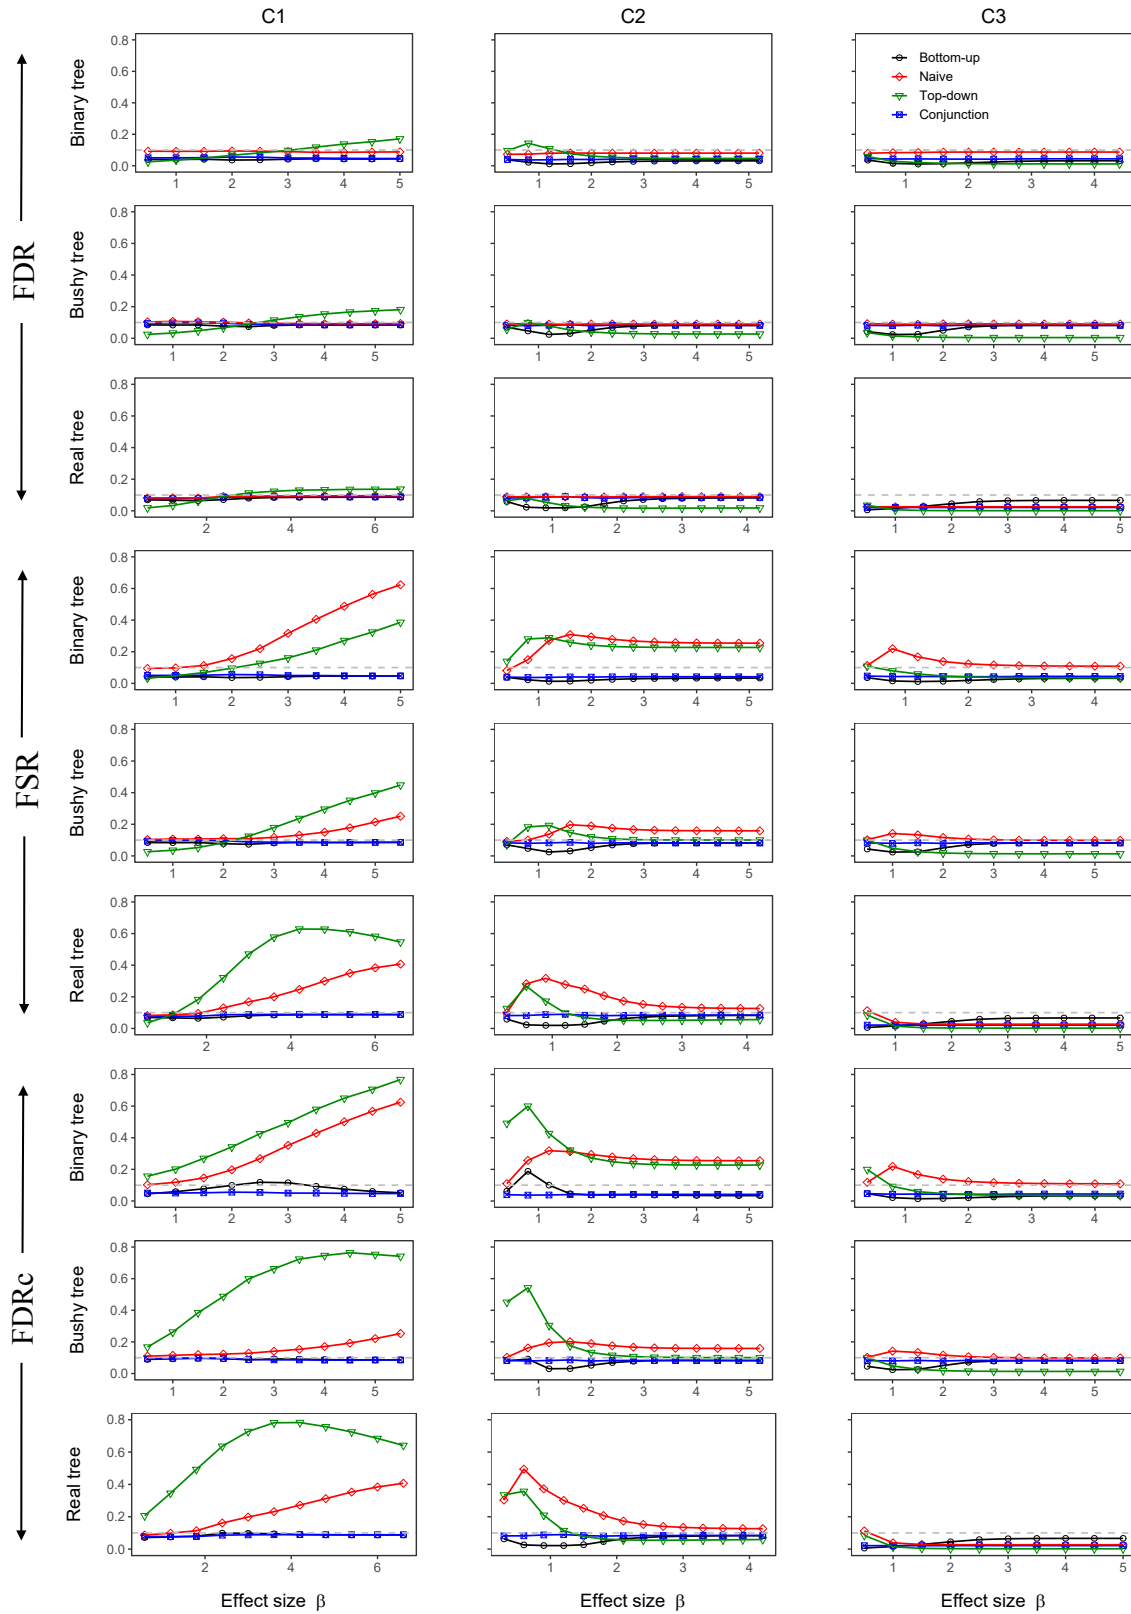

Figure S3: Error rates for testing all nodes in the tree. The non-null  $p$ -values at leaf nodes were simulated from the Gaussian-tailed model.

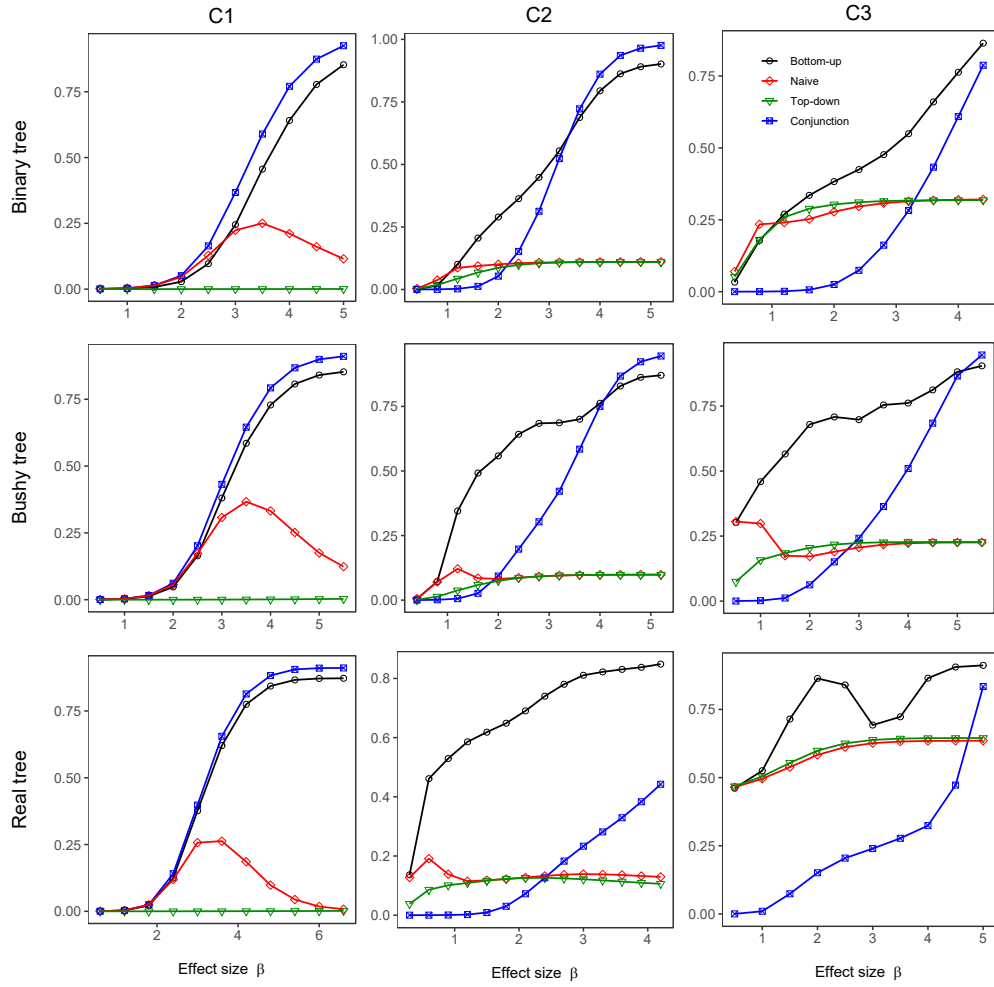

Figure S4: Accuracy (weighted Jaccard similarity) for detecting all associated nodes (including the driver nodes and all of their descendants at all levels). The non-null  $p$ -values at leaf nodes were simulated from the Gaussian-tailed model.

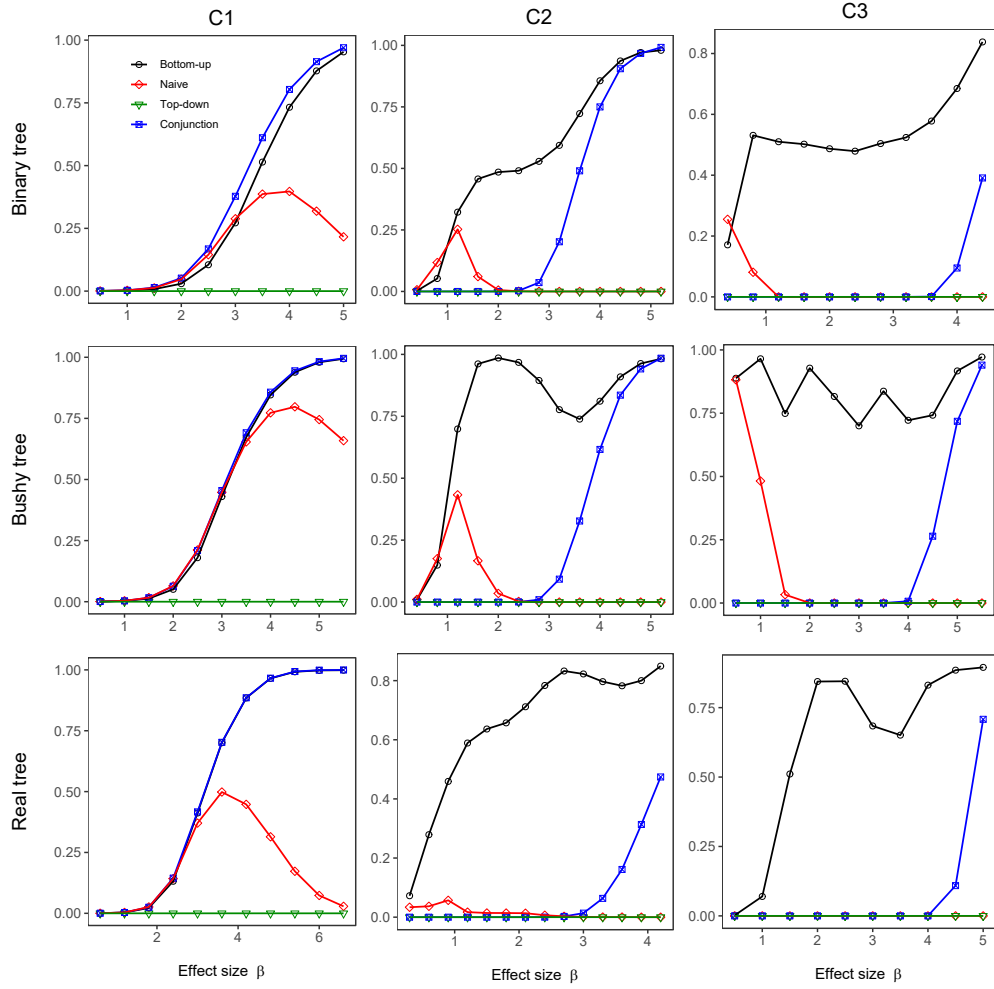

Figure S5: Percentage of driver nodes that were pinpointed. The non-null  $p$ -values at leaf nodes were simulated from the Gaussian-tailed model.

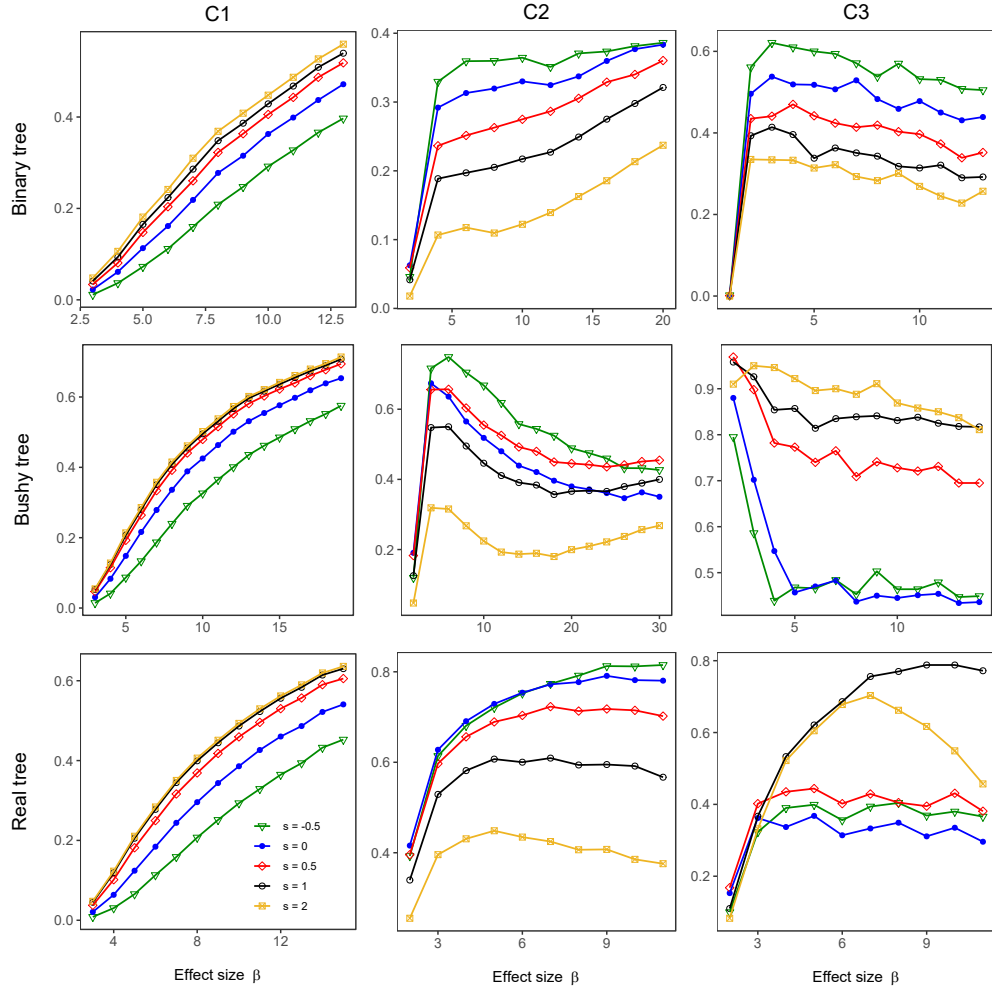

Figure S6: Percentage of driver nodes that were pinpointed by our bottom-up test with different schemes that partition the total error rate  $q$  into  $q_1, \dots, q_L$ . We considered partitioning schemes that set  $q_l$  proportional to  $n_l^s$ , where  $s \in \{-0.5, 0, 0.5, 1, 2\}$ . Thus,  $s = 1$  corresponds to the default partition in our bottom-up test. Compared to the default partition,  $s = 2$  gives higher  $q_l$  to lower levels and  $s = -0.5$  gives higher  $q_l$  to higher levels. The non-null  $p$ -values at leaf nodes were simulated from a  $\text{Beta}(1/\beta, 1)$  distribution.

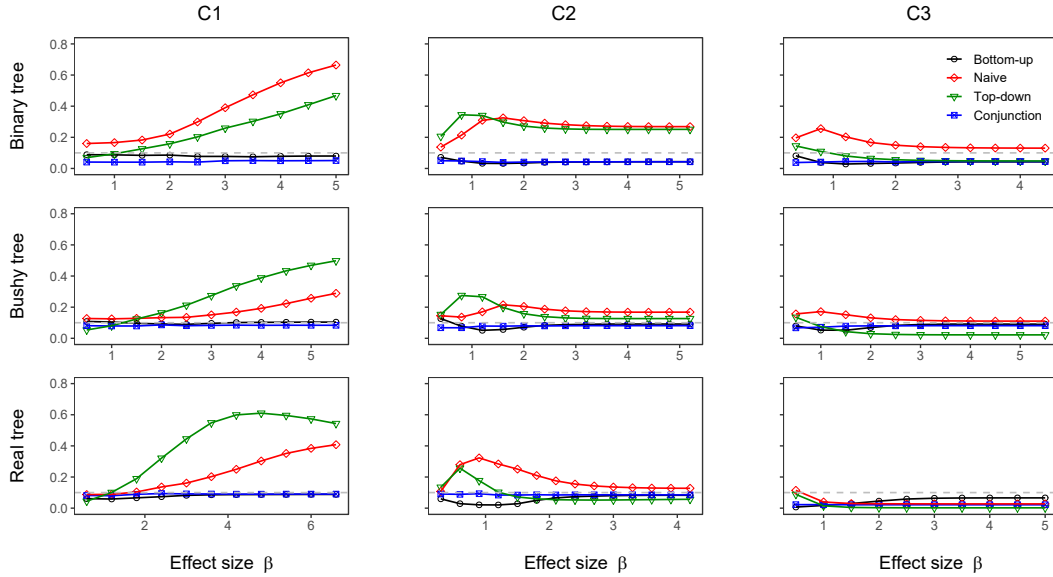

Figure S7: FSR for testing all nodes in the tree where there are weak dependencies among null leaf nodes. The non-null  $p$ -values at leaf nodes were simulated from the Gaussian-tailed model. For null OTUs, a vector  $Z$  was first drawn from  $Z \sim N(0, \Sigma)$ , where  $\Sigma$  has 1's for diagonal elements, 0.1 for off-diagonal elements whose row index  $j$  and column index  $k$  satisfy  $|j - k| \leq 4$ , and 0 for the remaining off-diagonal elements; then each  $p$ -value was converted from each element in  $Z$  by  $p_i = 1 - \Phi(Z_i)$ , where  $\Phi$  is the standard normal cumulative distribution function. This simulation model resulted in dependent OTUs if they are “adjacent”.

Table S1: Taxa detected by the weighted bottom-up test to be differential abundant between the UC and control groups

| Taxon                                                                                                                                                                | p-value                |
|----------------------------------------------------------------------------------------------------------------------------------------------------------------------|------------------------|
| <i>p-Actinobacteria</i> ; <i>c-Coriobacteriia</i> #                                                                                                                  | $1.39 \times 10^{-4}$  |
| <i>p-Actinobacteria</i> ; <i>c-Coriobacteriia</i> #; <i>o-Coriobacteriales</i>                                                                                       | $1.39 \times 10^{-4}$  |
| <i>p-Actinobacteria</i> ; <i>c-Coriobacteriia</i> #; <i>o-Coriobacteriales</i> ; <i>f-Coriobacteriaceae</i>                                                          | $1.39 \times 10^{-4}$  |
| <i>p-Actinobacteria</i> ; <i>c-Coriobacteriia</i> #; <i>o-Coriobacteriales</i> ; <i>f-Coriobacteriaceae</i> ; <i>g-Slackia</i>                                       | $3.42 \times 10^{-4}$  |
| <i>p-Bacteroidetes</i> ; <i>c-Bacteroidia</i> ; <i>o-Bacteroidales</i> ; <i>f-Bacteroidaceae</i> ; <i>g-Bacteroides</i> ; <i>s-ovatus</i> #                          | $3.09 \times 10^{-5}$  |
| <i>p-Bacteroidetes</i> ; <i>c-Bacteroidia</i> ; <i>o-Bacteroidales</i> ; <i>f-[Paraprevotellaceae]</i> ; <i>g-[Prevotella]</i> #                                     | $3.44 \times 10^{-4}$  |
| <i>p-Bacteroidetes</i> ; <i>c-Bacteroidia</i> ; <i>o-Bacteroidales</i> ; <i>f-Prevotellaceae</i> #                                                                   | $1.64 \times 10^{-3}$  |
| <i>p-Bacteroidetes</i> ; <i>c-Bacteroidia</i> ; <i>o-Bacteroidales</i> ; <i>f-Prevotellaceae</i> #; <i>g-Prevotella</i>                                              | $1.64 \times 10^{-3}$  |
| <i>p-Bacteroidetes</i> ; <i>c-Bacteroidia</i> ; <i>o-Bacteroidales</i> ; <i>f-Prevotellaceae</i> #; <i>g-Prevotella</i> ; <i>s-copri</i>                             | $2.82 \times 10^{-10}$ |
| <i>p-Bacteroidetes</i> ; <i>c-Bacteroidia</i> ; <i>o-Bacteroidales</i> ; <i>f-S2J-7</i> #                                                                            | $2.08 \times 10^{-3}$  |
| <i>p-Cyanobacteria</i> ; <i>c-Chloroplast</i> #                                                                                                                      | $1.73 \times 10^{-4}$  |
| <i>p-Cyanobacteria</i> ; <i>c-Chloroplast</i> #; <i>o-Streptophyta</i>                                                                                               | $1.73 \times 10^{-4}$  |
| <i>p-Firmicutes</i> ; <i>c-Clostridia</i> #                                                                                                                          | $6.35 \times 10^{-5}$  |
| <i>p-Firmicutes</i> ; <i>c-Clostridia</i> #; <i>o-Streptophyta</i>                                                                                                   | $< 1 \times 10^{-16}$  |
| <i>p-Firmicutes</i> ; <i>c-Clostridia</i> #; <i>o-Clostridiales</i>                                                                                                  | $5.13 \times 10^{-4}$  |
| <i>p-Firmicutes</i> ; <i>c-Clostridia</i> #; <i>o-Clostridiales</i> ; <i>f-Clostridiaceae</i> ; <i>g-Clostridium</i>                                                 | $1.29 \times 10^{-13}$ |
| <i>p-Firmicutes</i> ; <i>c-Clostridia</i> #; <i>o-Clostridiales</i> ; <i>f-Lachnospiraceae</i>                                                                       | $3.20 \times 10^{-7}$  |
| <i>p-Firmicutes</i> ; <i>c-Clostridia</i> #; <i>o-Clostridiales</i> ; <i>f-Lachnospiraceae</i> ; <i>g-Coproccocus</i>                                                | $< 1 \times 10^{-16}$  |
| <i>p-Firmicutes</i> ; <i>c-Clostridia</i> #; <i>o-Clostridiales</i> ; <i>f-Ruminococcaceae</i>                                                                       | $9.50 \times 10^{-5}$  |
| <i>p-Firmicutes</i> ; <i>c-Clostridia</i> #; <i>o-Clostridiales</i> ; <i>f-Ruminococcaceae</i> ; <i>g-Faecalibacterium</i> ; <i>s-prausnitzii</i>                    | $2.82 \times 10^{-3}$  |
| <i>p-Firmicutes</i> ; <i>c-Clostridia</i> #; <i>o-Clostridiales</i> ; <i>f-Ruminococcaceae</i> ; <i>g-Ruminococcus</i>                                               | $2.82 \times 10^{-3}$  |
| <i>p-Firmicutes</i> ; <i>c-Clostridia</i> #; <i>o-Clostridiales</i> ; <i>f-Veillonellaceae</i> ; <i>g-Veillonella</i> ; <i>s-parvula</i>                             | $1.00 \times 10^{-4}$  |
| <i>p-Firmicutes</i> ; <i>c-Erysipelotrichi</i> #                                                                                                                     | $6.01 \times 10^{-4}$  |
| <i>p-Firmicutes</i> ; <i>c-Erysipelotrichi</i> #; <i>o-Erysipelotrichales</i>                                                                                        | $6.01 \times 10^{-4}$  |
| <i>p-Firmicutes</i> ; <i>c-Erysipelotrichi</i> #; <i>o-Erysipelotrichales</i> ; <i>f-Erysipelotrichaceae</i>                                                         | $6.01 \times 10^{-4}$  |
| <i>p-Firmicutes</i> ; <i>c-Erysipelotrichi</i> #; <i>o-Erysipelotrichales</i> ; <i>f-Erysipelotrichaceae</i> ; <i>g-cc-115</i>                                       | $2.80 \times 10^{-3}$  |
| <i>p-Proteobacteria</i> ; <i>c-Gammaproteobacteria</i> ; <i>o-Enterobacteriales</i> ; <i>f-Enterobacteriaceae</i> ; <i>g-Morganella</i> #                            | $3.09 \times 10^{-3}$  |
| <i>p-Proteobacteria</i> ; <i>c-Gammaproteobacteria</i> ; <i>o-Enterobacteriales</i> ; <i>f-Enterobacteriaceae</i> ; <i>g-Enterobacter</i> ; <i>s-radicincitams</i> # | $2.61 \times 10^{-4}$  |
| <i>p-Tenericutes</i> ; <i>c-RF3</i> #                                                                                                                                | $4.25 \times 10^{-3}$  |
| <i>p-Verrucomicrobia</i> #                                                                                                                                           | $1.25 \times 10^{-3}$  |
| <i>p-Verrucomicrobia</i> #; <i>c-Verrucomicrobiae</i>                                                                                                                | $1.25 \times 10^{-3}$  |
| <i>p-Verrucomicrobia</i> #; <i>c-Verrucomicrobiae</i> ; <i>o-Verrucomicrobiales</i>                                                                                  | $1.25 \times 10^{-3}$  |
| <i>p-Verrucomicrobia</i> #; <i>c-Verrucomicrobiae</i> ; <i>o-Verrucomicrobiales</i> ; <i>f-Verrucomicrobiaceae</i>                                                   | $1.25 \times 10^{-3}$  |
| <i>p-Verrucomicrobia</i> #; <i>c-Verrucomicrobiae</i> ; <i>o-Verrucomicrobiales</i> ; <i>f-Verrucomicrobiaceae</i> ; <i>g-Akkermansia</i>                            | $1.25 \times 10^{-3}$  |
| <i>p-Verrucomicrobia</i> #; <i>c-Verrucomicrobiae</i> ; <i>o-Verrucomicrobiales</i> ; <i>f-Verrucomicrobiaceae</i> ; <i>g-Akkermansia</i> ; <i>s-muciniphila</i>     | $1.25 \times 10^{-3}$  |

NOTE: The detected driver taxa are marked with "#". Kingdom *Bacteria* is omitted from the taxon names.
